# Supplementary material for: Estrogen promotes estrogen receptor negative BRCA1-deficient tumor initiation and progression
Source: Springer Nature journal article supplement (doi:10.1186/s13058-018-0996-9), 2018-07-11

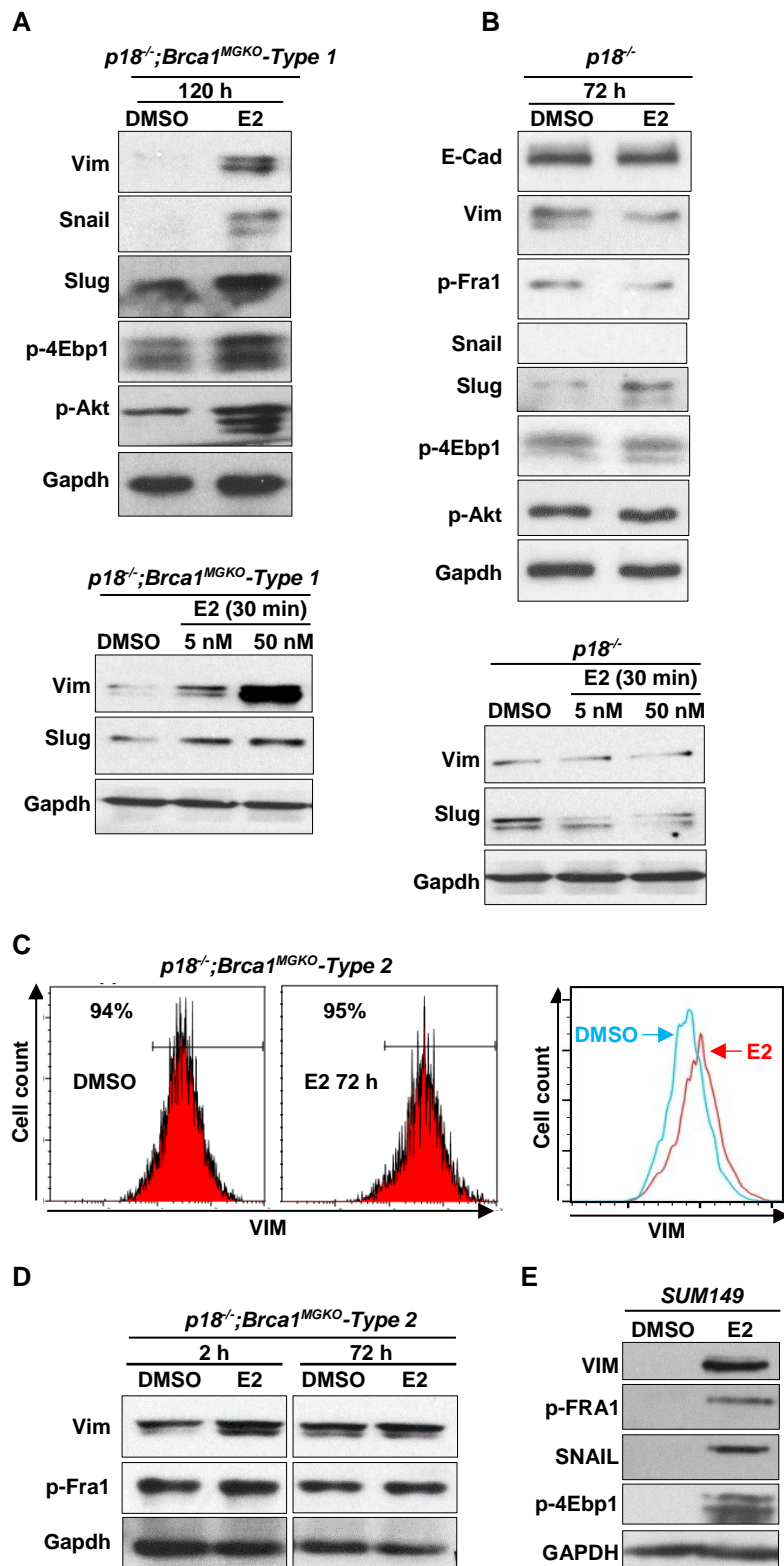

Supplement: MOESM6 [file 15945708]
